# Supplementary material
Source: publisher figshare collection journal article supplement (https://acs.figshare.com/ndownloader/files/4706209)
Supplement: Supplementary file 1 [file 4706209]

## Supporting Information

**The procedure to synthesis of  $\text{LaCO}_3\text{OH}$  using  $\text{NaOH}$  and  $\text{Na}_2\text{CO}_3$  as the precipitator:** 0.0045 mol  $\text{NaOH}$  and 0.0045 mol  $\text{Na}_2\text{CO}_3$  were dissolved with 20 mL deionized water under stirring. The mixture was rapidly added to 20 mL of 0.03 M  $\text{La}(\text{NO}_3)_3 \cdot 6\text{H}_2\text{O}$  aqueous solution under vigorously stirring, giving a transparent sol. Then transferred it into a 60 mL Teflon liner and some distilled water was added up to 80 % of the total volume, then it was put into a stainless autoclave and maintained at 230 °C for 8 h. It was cooled to ambient temperature naturally. Then, the precipitates were washed with distilled water and absolute ethanol some times, and dried at 80 °C for 6 h. The products were finally obtained.

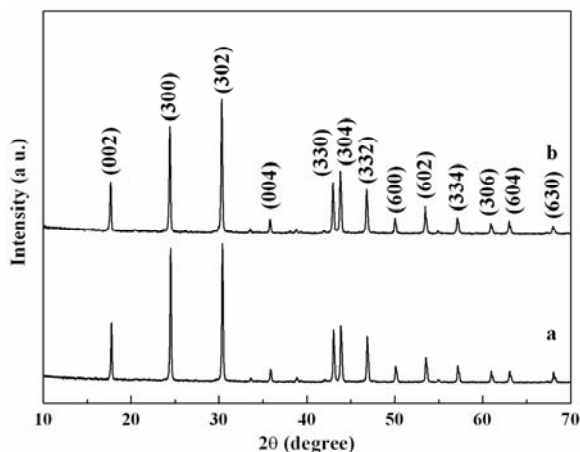

**Figure 1.** XRD patterns of the samples obtained at the 230 °C for 8 h. (a) Using  $\text{NaOH}$  and  $\text{Na}_2\text{CO}_3$  as the precipitator; (b) Using urea as the precipitator.
